# Supplementary material for: Plasticity in the Glucagon Interactome Reveals Novel Proteins That Regulate Glucagon Secretion in α-TC1-6 Cells
Source: PubMed Central journal article supplement (PMC6346685; doi:10.3389/fendo.2018.00792), 2019-01-18
Supplement: Table_1.pdf [file Table_1.pdf]

**Supplementary Table 1:** Reagents and resources.

| <b>REAGENT or RESOURCE</b>       | <b>SOURCE</b>              | <b>IDENTIFIER</b>   | <b>Research Resource Identification number</b> |
|----------------------------------|----------------------------|---------------------|------------------------------------------------|
| GABA                             | Sigma                      | Cat # A2129         |                                                |
| Insulin                          | Sigma                      | Cat # 105-16        |                                                |
| ApogeeMix beads                  | Apogee FlowSystems Inc.    | Cat # 1493          |                                                |
| Lipofectamine 2000               | Invitrogen                 | Cat # 11668-027     |                                                |
| Acetonitrile                     | BDH                        | Cat # 83639.100E    |                                                |
| Formic acid                      | Optima                     | Cat # A117-50       |                                                |
| Dithiotreitol                    | Fisher Scientific          | Cat # BP172-5       |                                                |
| Iodoacetamide                    | Alfa Aesar                 | Cat # A14715        |                                                |
| Protein A Sepharose CL-4B        | GE Healthcare Life Science | Cat # 71-7090-00 AF |                                                |
| HYPERSEP C18 column              | ThermoFisher Scientific    | Cat # 60108-303     |                                                |
| Mini Protease Inhibitor Cocktail | Sigma-Aldrich              | Cat # 11836153001   |                                                |
| Trypsin                          | Promega                    | Cat # V5111         |                                                |

**Supplementary Table 1 (Continued)**

| <b>REAGENT or RESOURCE</b>              | <b>SOURCE</b>    | <b>IDENTIFIER</b> | <b>Research Resource Identification number</b> |
|-----------------------------------------|------------------|-------------------|------------------------------------------------|
| Collagen type 1                         | Sigma            | Cat # C3867       |                                                |
| NuPAGE                                  | Invitrogen       | Cat # NP0335Box   |                                                |
| iBlot Gel Transfer stacks, PVDF         | Invitrogen       | Cat # IB401001    |                                                |
| Anti-GRP78 Bip (HSPA5) antibody         | Abcam            | Cat # Ab21685     |                                                |
| Anti-VAMP2 antibody                     | Abcam            | Cat # ab181869    | AB_2721005                                     |
| Anti-TGN46 antibody                     | Abcam            | Cat # 1605        | AB_443307                                      |
| Anti-LaminB1 antibody                   | Abcam            | Cat # ab16048     | AB_443298                                      |
| Anti-Histone H4 antibody (ChIP grade)   | Abcam            | Cat # ab10158     | AB_296888                                      |
| Anti-Glucagon antibody                  | Abcam            | Cat # Ab10988     | AB_297642                                      |
| ProLong Gold antifade reagent with DAPI | Molecular Probes | Cat # P36935      |                                                |

**Supplementary Table 1 (Continued)**

| <b>REAGENT or RESOURCE</b>          | <b>SOURCE</b>    | <b>IDENTIFIER</b> | <b>Research Resource Identification number</b> |
|-------------------------------------|------------------|-------------------|------------------------------------------------|
| AlexaFluor 488 goat anti-mouse IgG  | Molecular Probes | Cat # A-11001     | AB_2534069                                     |
| AlexaFluor 488 goat anti-rabbit IgG | Molecular Probes | Cat # A-11012     | AB_2534079                                     |
| Fc-specific FITC antibody           | Sigma            | Cat # F4143       | AB_259587                                      |
| Anti-ERC1 antibody                  | Abcam            | Cat # ab 180507   |                                                |
| Anti- MDH1 antibody                 | Abcam            | Cat # ab 180152   |                                                |
| Anti-ATP5A antibody                 | Abcam            | Cat # ab 176569   |                                                |
| Anti-Aconitase 2 antibody           | Abcam            | Cat # ab 129105   |                                                |
| Anti-peroxiredoxin2 antibody        | Abcam            | Cat # ab 109367   |                                                |
| Anti-TUBA1B antibody                | Abcam            | Cat # ab 108629   |                                                |
| Anti-14-3-3zeta antibody            | Abcam            | Cat # ab 51129    |                                                |

**Supplementary Table 1 (Continued)**

| <b>REAGENT or RESOURCE</b>            | <b>SOURCE</b>            | <b>IDENTIFIER</b>                                         | <b>Research Resource Identification number</b> |
|---------------------------------------|--------------------------|-----------------------------------------------------------|------------------------------------------------|
| Anti Na/K ATPase antibody             | Thermo Fisher Scientific | Cat# PA5-75640                                            |                                                |
| Anti-PDI antibody                     | Abcam                    | Cat # ab 3672                                             |                                                |
| Anti-Calreticulin antibody            | Abcam                    | Cat # ab 2907                                             |                                                |
| Anti-Histone H4 antibody              | Abcam                    | Cat # ab 10158                                            |                                                |
| <b>Software and Algorithms</b>        |                          |                                                           |                                                |
| Panther Classification System         |                          | <a href="http://Pantherdb.org">http://Pantherdb.org</a>   | SCR_015893                                     |
| ExPASY Bioinformatics Resource Portal |                          | <a href="http://string-db.org">http://string-db.org</a>   | SCR_015894                                     |
| UniportKB                             |                          | <a href="http://uniport.org">http://uniport.org</a>       | SCR_004426                                     |
| STRING                                |                          | <a href="https://string-db.org">https://string-db.org</a> | SCR_005223                                     |
| <b>Experimental model: cell line</b>  |                          |                                                           |                                                |
| Alpha TC1-6 cell                      |                          | mouse pancreatic $\alpha$ -cell line                      |                                                |

**Supplementary Table 1 (Continued)**

| <b>REAGENT or RESOURCE</b>                      | <b>SOURCE</b>            | <b>IDENTIFIER</b>                                               | <b>Research Resource Identification number</b> |
|-------------------------------------------------|--------------------------|-----------------------------------------------------------------|------------------------------------------------|
| <b>Recombinant DNA</b>                          |                          |                                                                 |                                                |
| FC_pcDNA3.1(+)                                  |                          | <a href="http://www.genscript.com">http://www.genscript.com</a> |                                                |
| FC-glucagon_pcDNA3.1(+)                         |                          | <a href="http://www.genscript.com">http://www.genscript.com</a> |                                                |
| <b>Commercial assays</b>                        |                          |                                                                 |                                                |
| Glucagon assay kit                              | ThermoFisher Scientific  | Cat # EHGCG                                                     |                                                |
| BCA protein assay kit                           | Biovision Incorporated   | Cat # K813-2500                                                 |                                                |
| Histone H4 Modification Multiplex Assay Kit     | Abcam                    | Cat # Ab185914                                                  |                                                |
| RNeasy extraction kit                           | Qiagen                   | Cat # 74104                                                     |                                                |
| SuperScript III First Strand Synthesis Supermix | Thermo Fisher Scientific | Cat # 11752050                                                  |                                                |
| Maxima SYBR Green qPCR Master Mix               | Thermo Fisher Scientific | Cat # K0221                                                     |                                                |
| Maxima SYBR Green qPCR Master Mix               | Thermo Fisher Scientific | Cat # K0221                                                     |                                                |

| <b>siRNA</b>      |                          |                                              |  |
|-------------------|--------------------------|----------------------------------------------|--|
| 14-3-3 zeta/delta | Thermo Fisher Scientific | Cat # S76190<br>Cat # S76191<br>Cat # S76189 |  |
| Aconitase         | Thermo Fisher Scientific | Cat # S61847<br>Cat # S61845<br>Cat # S61846 |  |

**Supplementary Table 1 (Continued)**

| <b>REAGENT or RESOURCE</b>                  | <b>SOURCE</b>            | <b>IDENTIFIER</b>                               | <b>Research Resource Identification number</b> |
|---------------------------------------------|--------------------------|-------------------------------------------------|------------------------------------------------|
| Sodium-Potassium transporting subunit gamma | Thermo Fisher Scientific | Cat # S62726<br>Cat # S201066<br>Cat # S62725   |                                                |
| Protein disulfide-isomerase                 | Thermo Fisher Scientific | Cat # S71205<br>Cat # S71206                    |                                                |
| Peroxiredoxin-2                             | Thermo Fisher Scientific | Cat # S204749<br>Cat # S232273<br>Cat # S232272 |                                                |
| Malate dehydrogenase                        | Thermo Fisher Scientific | Cat # S69980                                    |                                                |

|                                                   |                             |                                               |  |
|---------------------------------------------------|-----------------------------|-----------------------------------------------|--|
| cytoplasmic                                       |                             | Cat # S69981<br>Cat # S69979                  |  |
| Aconitate hydratase<br>mitochondrial              | Thermo Fisher<br>Scientific | Cat # S61847<br>Cat # S61845<br>Cat # S61846  |  |
| ELKS/Rab6-<br>interacting/CAST<br>family member 1 | Thermo Fisher<br>Scientific | Cat # S200972<br>Cat # S99972<br>Cat # S99973 |  |

**Supplementary Table 1 (Continued)**

| <b>REAGENT or<br/>RESOURCE</b>              | <b>SOURCE</b>               | <b>IDENTIFIER</b>                               | <b>Research Resource<br/>Identification<br/>number</b> |
|---------------------------------------------|-----------------------------|-------------------------------------------------|--------------------------------------------------------|
| Tubulin alpha-1B<br>chain                   | Thermo Fisher<br>Scientific | Cat # S202331<br>Cat # S202330<br>Cat # S75582  |                                                        |
| ATP synthase subunit<br>alpha mitochondrial | Thermo Fisher<br>Scientific | Cat # S62742<br>Cat # S62744<br>Cat # S62743    |                                                        |
| Histone H4                                  | Thermo Fisher<br>Scientific | Cat # S234377<br>Cat # S234480<br>Cat # S234061 |                                                        |

|                                                   |                             |                                             |  |
|---------------------------------------------------|-----------------------------|---------------------------------------------|--|
| GCG (PPG)                                         | Thermo Fisher<br>Scientific | Cat# s66523<br>Cat# s66522<br>Cat# s66524   |  |
| $\beta$ -Actin                                    | Thermo Fisher<br>Scientific | Cat# s61899<br>Cat# s200989<br>Cat# s200988 |  |
| Mission siRNA<br>Universal Negative<br>Control #1 | Sigma                       | SIC001                                      |  |
