# Supplementary material for: Plasticity in the Glucagon Interactome Reveals Novel Proteins That Regulate Glucagon Secretion in α-TC1-6 Cells
Source: PubMed Central journal article supplement (PMC6346685; doi:10.3389/fendo.2018.00792), 2019-01-18
Supplement: Table_4.pdf [file Table_4.pdf]

**Supplementary Table 4:** Profile of the histone, cytoskeletal and ribosomal proteins contained within the glucagon interactome when  $\alpha$ TC1-6 cells were incubated for 24h in media containing 25 mM or 5.5 mM glucose.

| 25 mM glucose containing medium                                                                                                                                                                                                                                                                                                                                                                                                                                                                                                                                                                                                                                                                                                                                                                                                                                                                                                                                                                                                                                                                                                                                                                             | 5.5 mM glucose containing medium                                                                                                                                                                                                                                                                                                                                                                                                                                                                                                                                                                                                                                                                                                                                                                                                                                                                                                                                                                                                                                                                                                                                                                                                                                                                                                      |
|-------------------------------------------------------------------------------------------------------------------------------------------------------------------------------------------------------------------------------------------------------------------------------------------------------------------------------------------------------------------------------------------------------------------------------------------------------------------------------------------------------------------------------------------------------------------------------------------------------------------------------------------------------------------------------------------------------------------------------------------------------------------------------------------------------------------------------------------------------------------------------------------------------------------------------------------------------------------------------------------------------------------------------------------------------------------------------------------------------------------------------------------------------------------------------------------------------------|---------------------------------------------------------------------------------------------------------------------------------------------------------------------------------------------------------------------------------------------------------------------------------------------------------------------------------------------------------------------------------------------------------------------------------------------------------------------------------------------------------------------------------------------------------------------------------------------------------------------------------------------------------------------------------------------------------------------------------------------------------------------------------------------------------------------------------------------------------------------------------------------------------------------------------------------------------------------------------------------------------------------------------------------------------------------------------------------------------------------------------------------------------------------------------------------------------------------------------------------------------------------------------------------------------------------------------------|
| <p>Histone H2A type 1, Histone H2A type 1-F, Histone H2A type 1-F, Histone H2A type 1-H, Histone H2A type 1-K, Histone H2A type 2-A, Histone H2A type 2-B, Histone H2A type 2-C, Histone H2A type 3, Histone H2A.J, Histone H2AX, Histone H2B type 1-B, Histone H2B type 1-C/E/G, Histone H2B type 1-F/J/L, Histone H2B type 1-H, Histone H2B type 1-K, Histone H2B type 1-M, Histone H2B type 1-P, Histone H2B type 2-B, Histone H2B type 2-E, Histone H2B type 3-A, Histone H2B type 3-B</p> <p>Actin cytoplasmic 2, Actin cytoplasmic 1, Actin alpha skeletal muscle, Actin aortic smooth muscle, Actin alpha cardiac muscle 1, Actin gamma-enteric smooth muscle, Beta-actin-like protein 2, Tubulin beta-4B chain, Tubulin alpha-1C chain, Tubulin alpha-1A chain, Tubulin alpha-1B chain, Tubulin beta-5 chain, Tubulin beta-2B chain, Tubulin beta-4A chain, Tubulin beta-3 chain, Tubulin beta-2A chain</p> <p>60S ribosomal protein L13, 40S ribosomal protein S14, 60S ribosomal protein L23a, 60S ribosomal protein L11, 60S acidic ribosomal protein P1, Elongation factor 1-delta, Elongation factor 1-alpha 2, Eukaryotic translation initiation factor 5A-1, Elongation factor 1-alpha 1</p> | <p>Histone H2A type 3, Histone H2A type 1-F, Histone H2B type 1-B, Histone H1.3, Histone H2A type 2-A, Histone H2B type 1-H, Histone H2B type 3-A, Histone H4, Histone H3.3, Histone H3.3C, Histone H2A.J, Histone H2A type 1-K, Histone H3.1, Histone H2A type 2-C, Histone H2A type 1, Histone H2B type 1-K, Histone H3.2, Histone H2B type 1-M, Histone H1.2, Histone H2B type 3-B, Histone H2B type 2-B, Histone H2B type 2-E, Histone H2B type 1-C/E/G, Histone H2A type 1-H, Histone H1.5, Histone H2B type 1-P, Histone H1.1, Histone H2A type 2-B, Histone H2A type 1-F, Histone H2B type 1-B, Histone H2AX, Histone H2B type 1-F/J/L</p> <p>Actin, cytoplasmic 1, Actin, cytoplasmic 2, Tubulin beta-4B chain, Tubulin beta-4A chain, Tubulin beta-5 chain, Tubulin alpha-1C chain, Tubulin beta-3 chain, Tubulin alpha-1A chain, Tubulin alpha-1B chain</p> <p>40S ribosomal protein S15a, 60S ribosomal protein L23a, 40S ribosomal protein S7, 40S ribosomal protein S25, 60S ribosomal protein L13, 40S ribosomal protein S14, 40S ribosomal protein S12, Elongation factor 1-alpha 2, 60S acidic ribosomal protein P1, 60S ribosomal protein L11, 60S ribosomal protein L18, 60S acidic ribosomal protein P2, Elongation factor 2, Ubiquitin-60S ribosomal protein L40, Eukaryotic translation initiation factor 4B</p> |
