# Supplementary material for: Plasticity in the Glucagon Interactome Reveals Novel Proteins That Regulate Glucagon Secretion in α-TC1-6 Cells
Source: PubMed Central journal article supplement (PMC6346685; doi:10.3389/fendo.2018.00792), 2019-01-18
Supplement: Table_7.pdf [file Table_7.pdf]

**Supplementary Table 7:** Functional categories of the proteins within the glucagon interactome in the context of 25 mM glucose. Proteins were functionally categorized using Panther GO-Slim Molecular Function analysis. Values show protein hits as percentage of the total number of hits within each category when  $\alpha$ TC1-6 cells were cultured in media containing 25 mM glucose.

|                                | Control | GABA | Insulin | GABA+ insulin |
|--------------------------------|---------|------|---------|---------------|
| Binding                        | 47.4    | 46.1 | 48.5    | 51.4          |
| Structural molecule activity   | 24.7    | 13.7 | 15.4    | 28.6          |
| Catalytic activity             | 19.6    | 22.5 | 26.2    | 17.1          |
| Receptor activity              | 1       | 5.9  | 2.3     | -             |
| Translation regulator activity | 4.1     | 1    | 2.3     | -             |
| Transporter activity           | 3.1     | 6.9  | 4.6     | 2.9           |
| Signal transducer activity     | -       | 2.9  | -       | -             |
| Antioxidant activity           | -       | 1    | 0.8     | -             |
