# Supplementary material for: Plasticity in the Glucagon Interactome Reveals Novel Proteins That Regulate Glucagon Secretion in α-TC1-6 Cells
Source: PubMed Central journal article supplement (PMC6346685; doi:10.3389/fendo.2018.00792), 2019-01-18
Supplement: Table_8.pdf [file Table_8.pdf]

**Supplementary Table 8:** Functional categories of proteins within the glucagon interactome in the context of 5.5 mM glucose. Proteins were functionally categorized using Panther GO-Slim Molecular Function analysis. Each value shows protein hit as percentage of the total number of hits within each category when  $\alpha$ TC1-6 cells were cultured in media containing 5.5 mM glucose.

|                                | Control | GABA | Insulin | GABA+ insulin |
|--------------------------------|---------|------|---------|---------------|
| Binding                        | 48.4    | 43.8 | 43.5    | 50.6          |
| Structural molecule activity   | 15      | 11.4 | 14.9    | 17.6          |
| Catalytic activity             | 25.5    | 28.6 | 31      | 22.4          |
| Receptor activity              | 2       | 1.6  | 1.2     | 1.2           |
| Translation regulator activity | 2.6     | 1.1  | 2       | 2.4           |
| Transporter activity           | 3.9     | 4.9  | 4.3     | 4.7           |
| Antioxidant activity           | 2       | 1.6  | 1.6     | 1.2           |
| Channel regulator activity     | -       | 0.5  | -       | -             |
| Signal transducer activity     | -       | 6.5  | 1.6     | -             |
